# Supplementary figures and images for: Absence of RNase H2 triggers generation of immunogenic micronuclei removed by autophagy
Source: Oxford University Press journal article supplement (doi:10.1093/hmg/ddx283), 2017-07-14

Fig. S1:

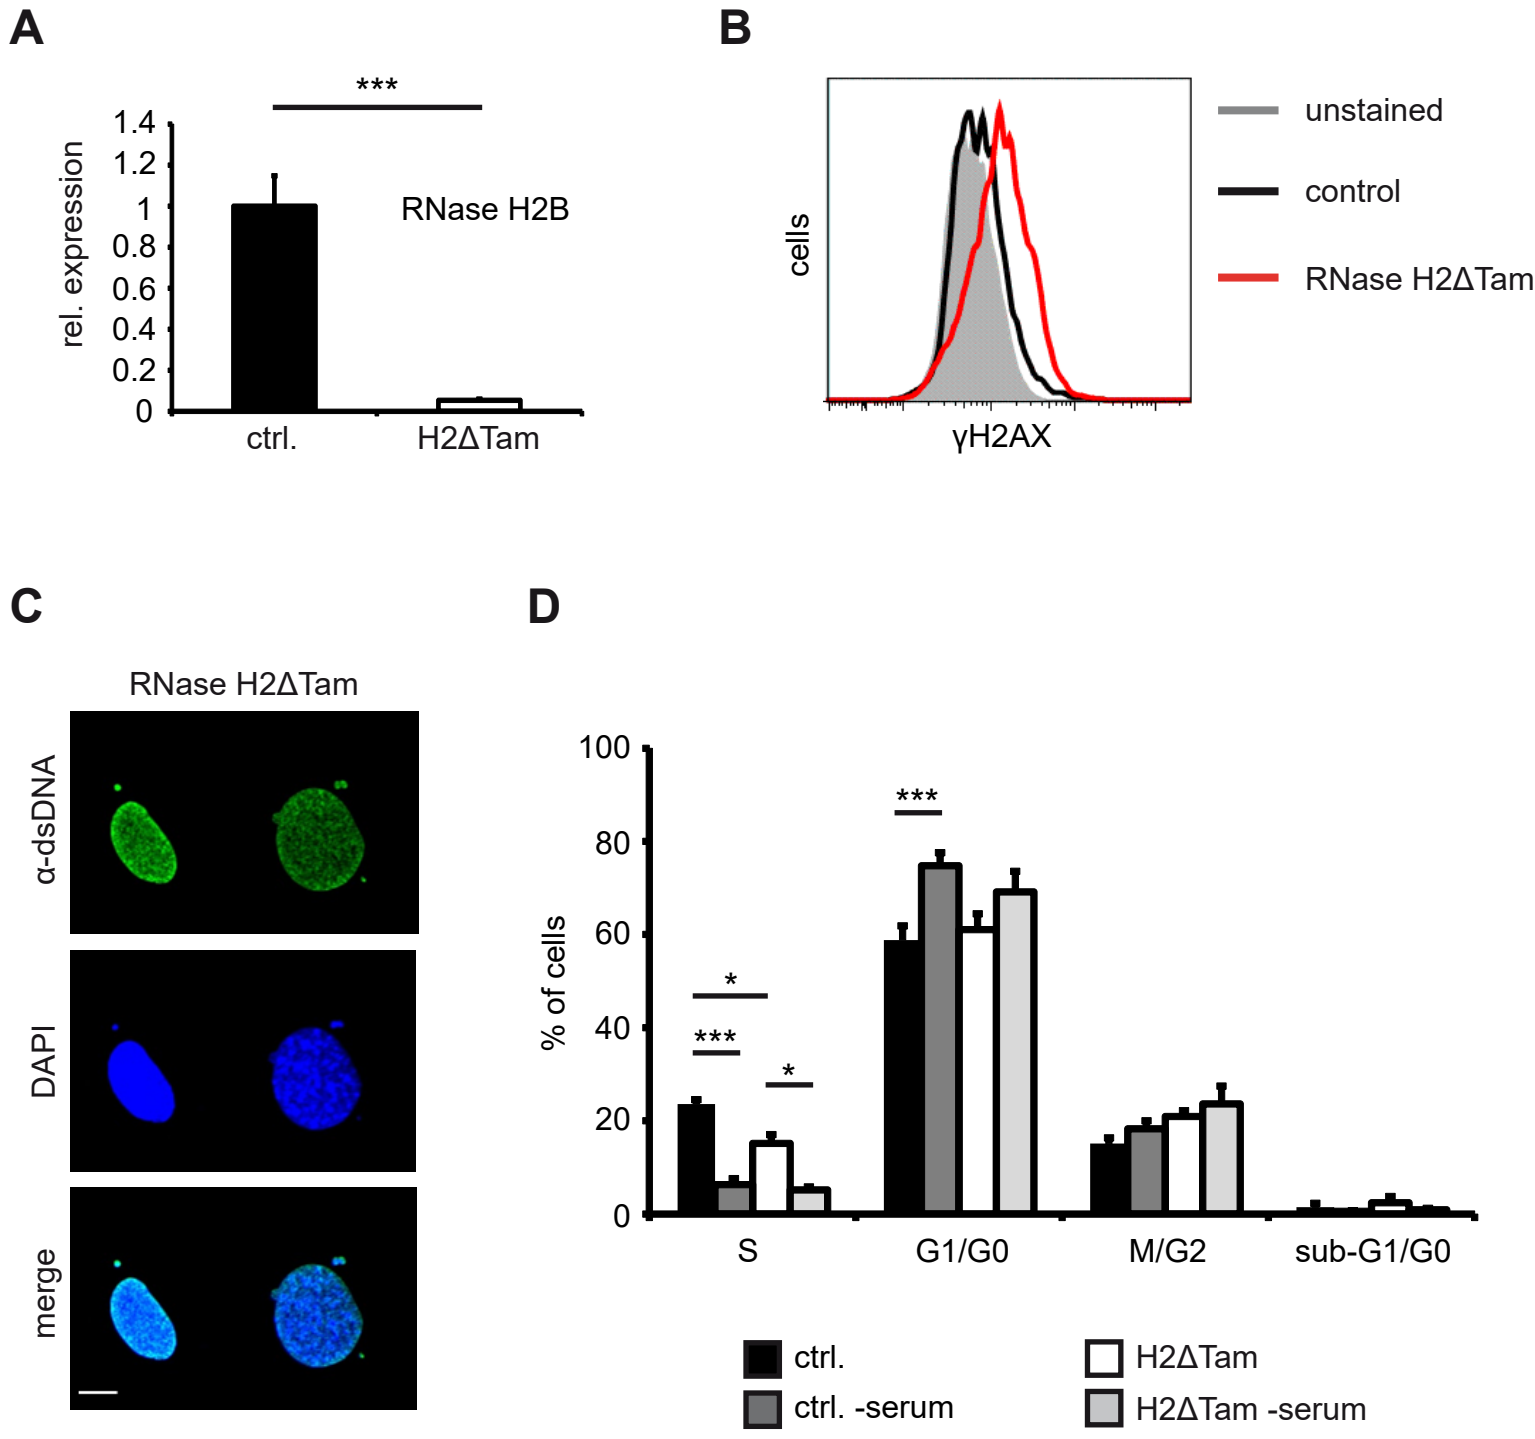

Fig. S3 :

**A**

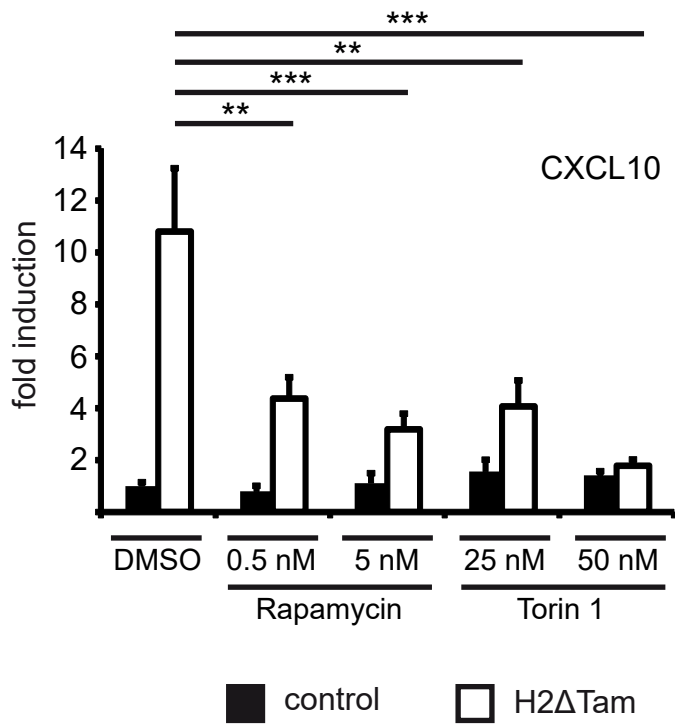

**B**

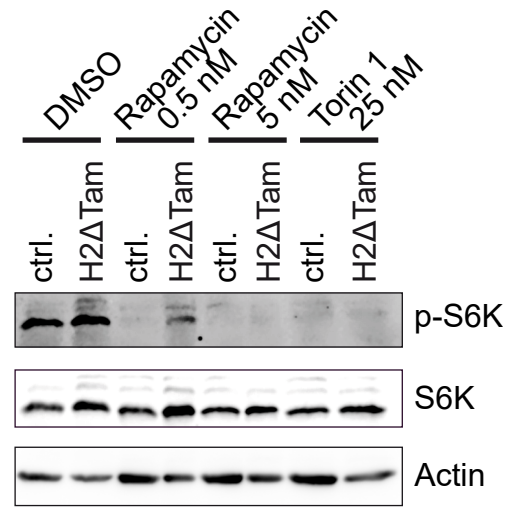

**C**

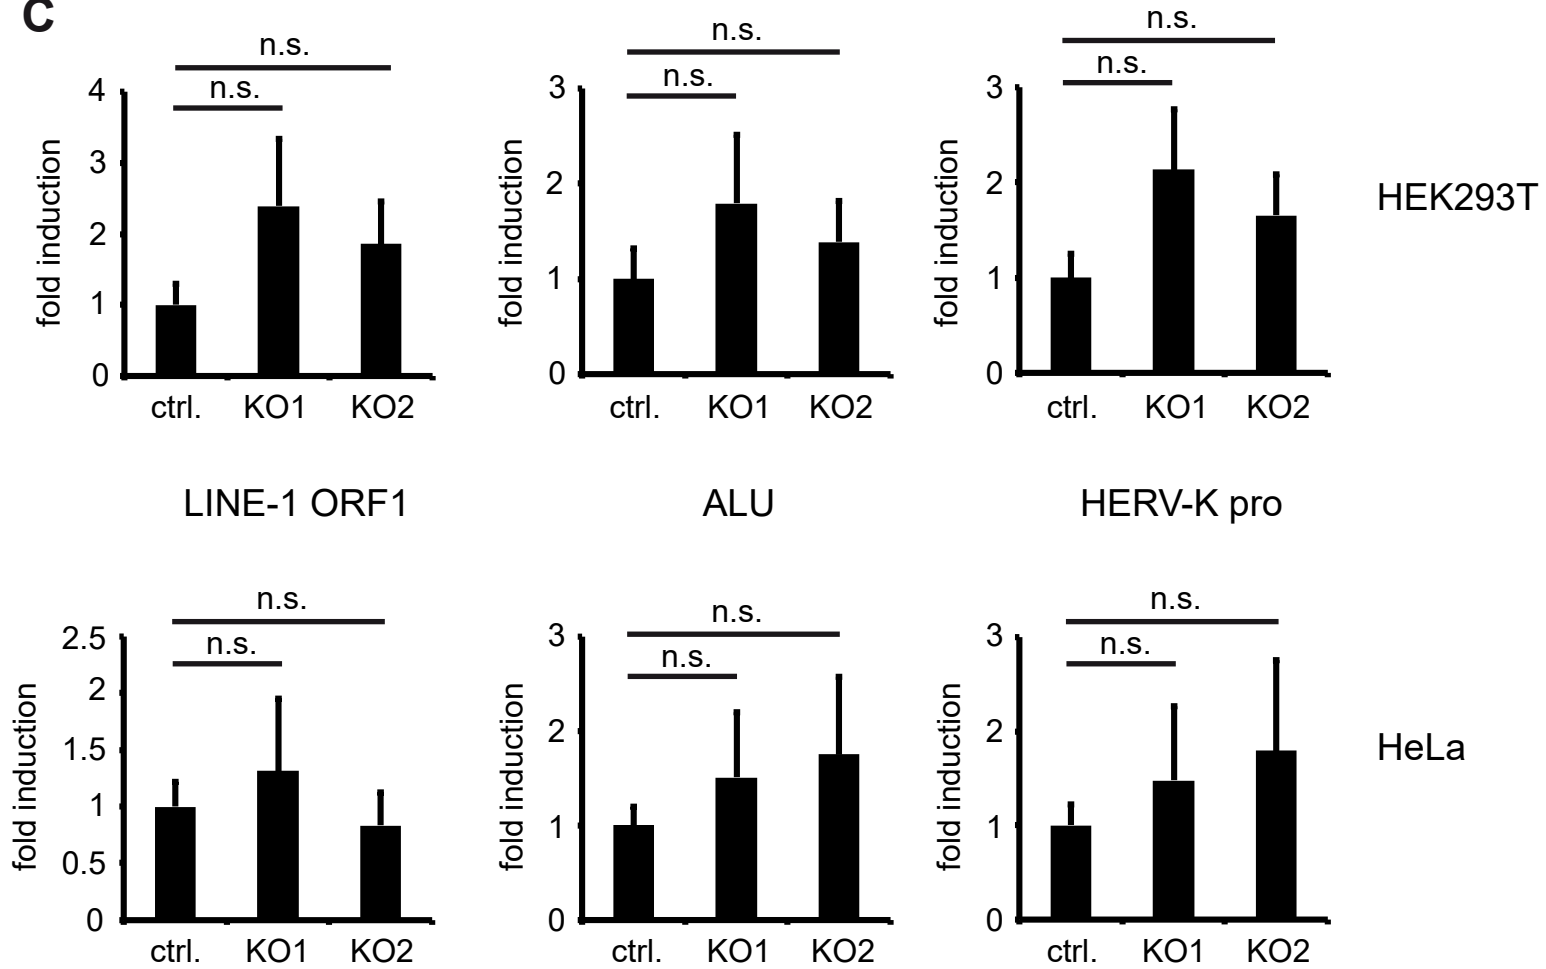

Fig. S2:

**A**

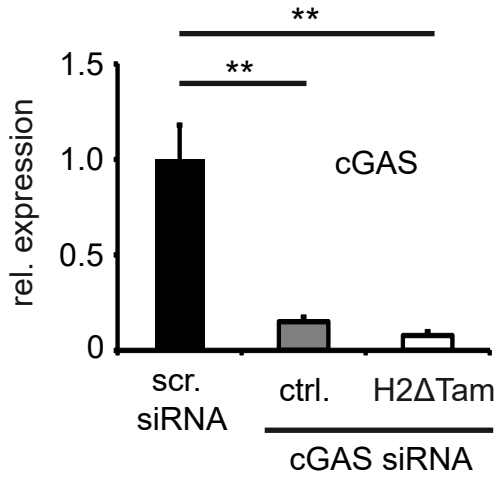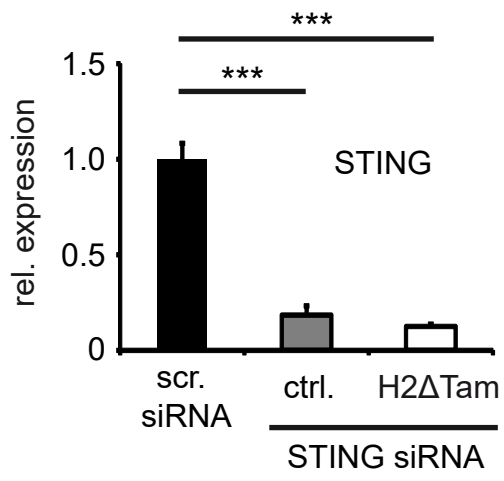

**B**

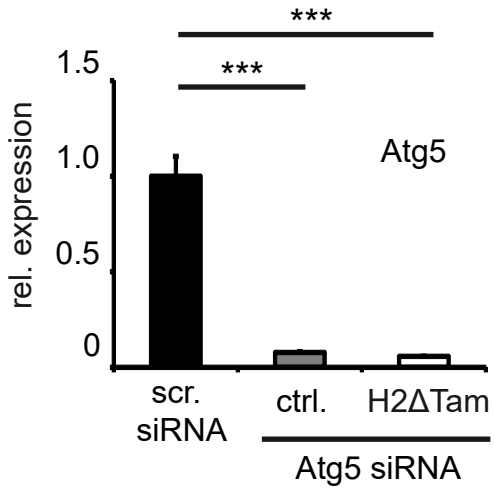

**C**

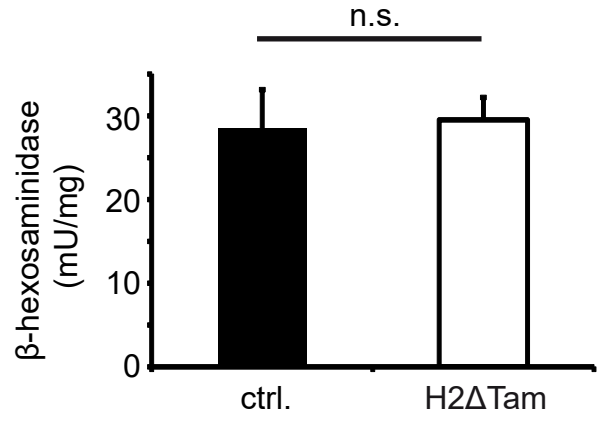

**D**

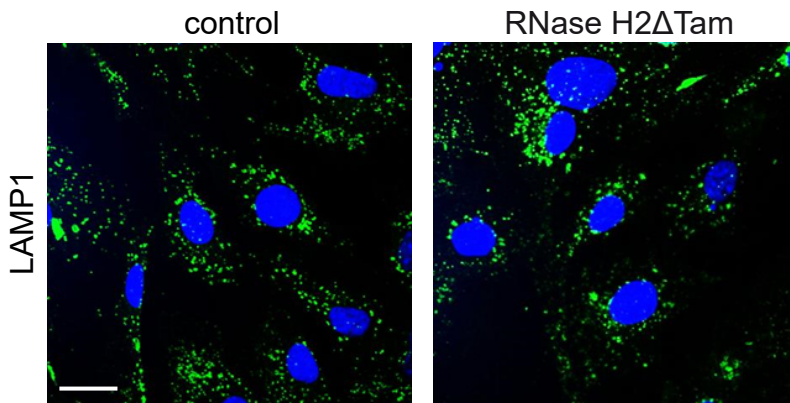

**E**

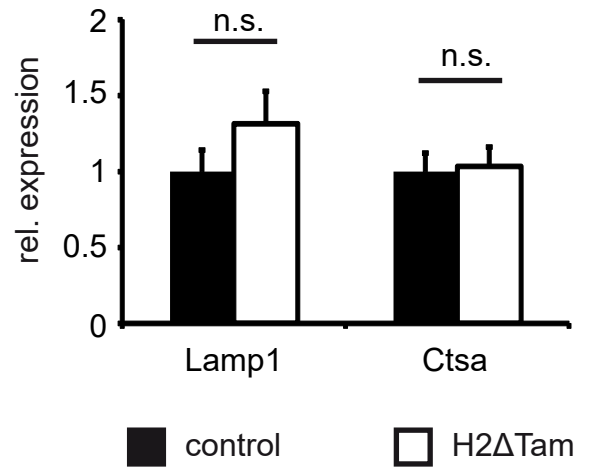

Fig. S4 :

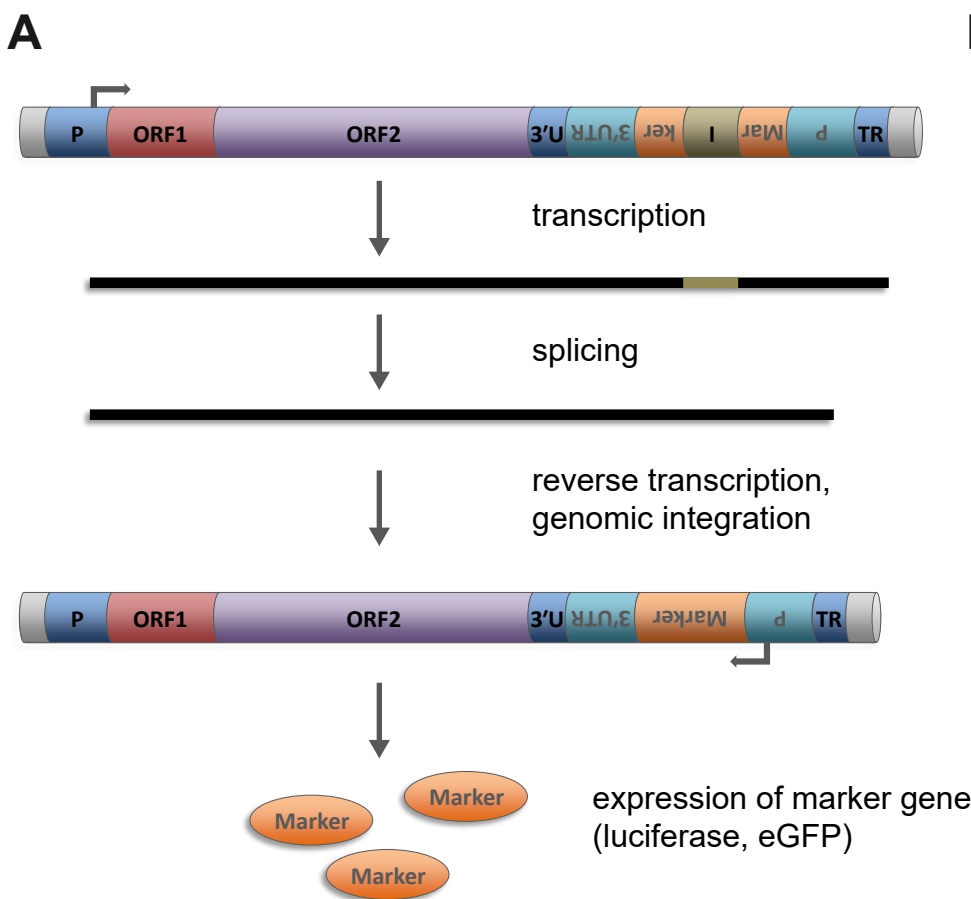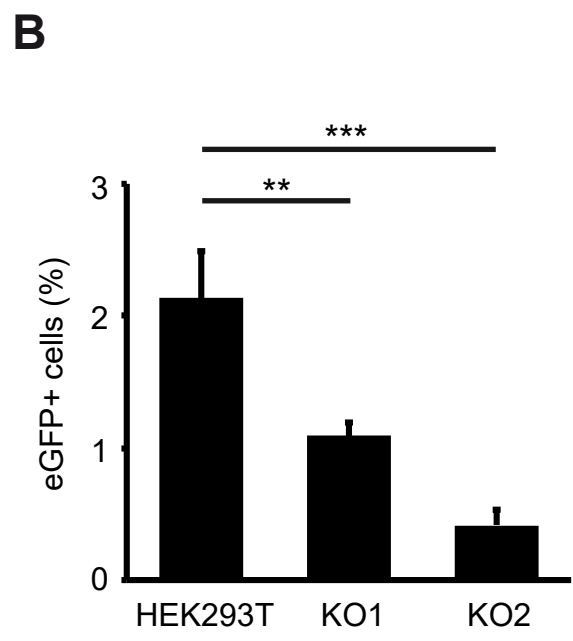

Supplement: Supplementary_Figures_ddx283.pdf [file Supplementary_Figures_ddx283.pdf]
